# Supplementary material for: Modulation of the emission intensity and color output of NaYF4 : Yb3+,Er3+ nanocrystals by OH−
Source: Royal Society of Chemistry journal article supplement (doi:10.1039/c3ce00025g), 2013-01-01
Supplement: c3ce00025g.pdf [file c3ce00025g.pdf]

S1. In the synthesis process of  $\text{NaYF}_4: \text{Yb}, \text{Er}$  nanocrystals,  $\text{NaOH}$  was coexist with oleic acid,  $\text{Re}(\text{NO}_3)_3$  and  $\text{NaF}$ .  $\text{NaOH}$  can react with oleic acid to form sodium oleate, and also can react with rare earth ions to form precipitation of  $\text{Re}(\text{OH})_3$ . In order to prove which reaction show priority, an experiment was done. 0.7 g  $\text{NaOH}$ , 7 mL OA, 14 mL deionized water, and 16.5 mL ethanol were mixed with stirring at room temperature. A settled solution was obtained and the pH value was 7.43. This indicated that OA reacted with  $\text{NaOH}$  and the sodium oleate was obtained. Then 2.5 mL 0.4 M 78% Y ( $\text{NO}_3$ )<sub>3</sub>, 20% Yb ( $\text{NO}_3$ )<sub>3</sub> and 2% Er ( $\text{NO}_3$ )<sub>3</sub> aqueous solution were added into the above solution, and white precipitations were observed immediately. After stirring for few minutes, oil drops emerged in the bottle. That is to say sodium oleate was hydrolyzed and oleic acid and  $\text{OH}^-$  were obtained, then the  $\text{OH}^-$  reacted with  $\text{Re}^{3+}$  to form  $\text{Re}(\text{OH})_3$  precipitation. It can be concluded that  $\text{OH}^-$  preferred to react with  $\text{Re}(\text{NO}_3)_3$  and form the  $\text{Re}(\text{OH})_3$ .

S2. To further certify the role of  $\text{NaOH}$  in the reaction process was not reacted with oleic acid to form sodium oleate, sodium oleate was also used as ligands for synthesis  $\text{NaYF}_4: \text{Yb}, \text{Er}$  nanocrystals. The upconverted spectrum of the product was measured. The results indicated that under the same conditions with that in Figure 1A, the emission peaks were nearly unobservable. So the spectrum was recorded under excitation of  $400 \text{ mW/cm}^2$  and both excitation and emission slit was 2.5 nm wide (Figure S1). That is to say, the upconverted fluorescence properties of sample directly using sodium oleate as ligand were greatly different from that of samples using oleic acid and  $\text{NaOH}$ .

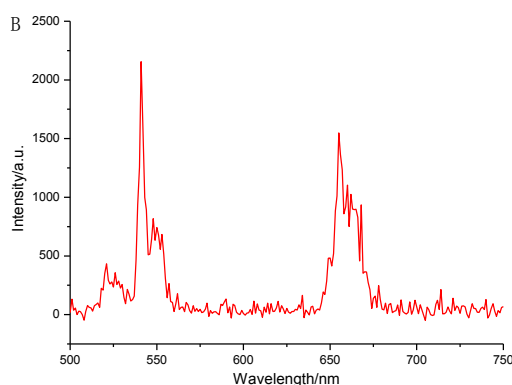

Figure S1 Upconverted fluorescence spectra of  $\text{NaYF}_4: \text{Yb}^{3+}, \text{Er}^{3+}$  nanocrystals prepared with sodium oleate excited with same power laser ( $400 \text{ mW/cm}^2$ , the concentration of  $\text{NaYF}_4: \text{Yb}^{3+}, \text{Er}^{3+}$  was the same with that in Figure 1, both excitation and emission slit was 2.5 nm wide
